# Supplementary material for: MFG-E8 promotes osteogenic transdifferentiation of smooth muscle cells and vascular calcification by regulating TGF-β1 signaling
Source: PubMed Central journal article supplement (PMC9018696; doi:10.1038/s42003-022-03313-z), 2022-04-19
Supplement: 42003_2022_3313_MOESM2_ESM.pdf [file 42003_2022_3313_MOESM2_ESM.pdf]

## Description of Additional Supplementary Files

**File name:** Supplementary Data 1

**Description:** Source data underlying the graphs.
